# Supplementary material
Source: ML conference proceedings conference paper supplement (https://proceedings.mlr.press/v97/zhang19e.html)
Supplement: Supplementary file [file zhang19e-supp.pdf]

## Supplementary Material

### A. Visualization of Circuit Topologies in the Dataset

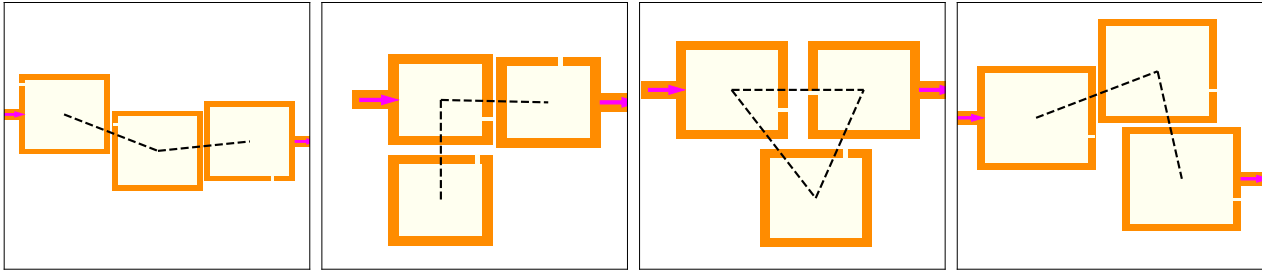

Figure 12. All different topologies for three resonator circuits.

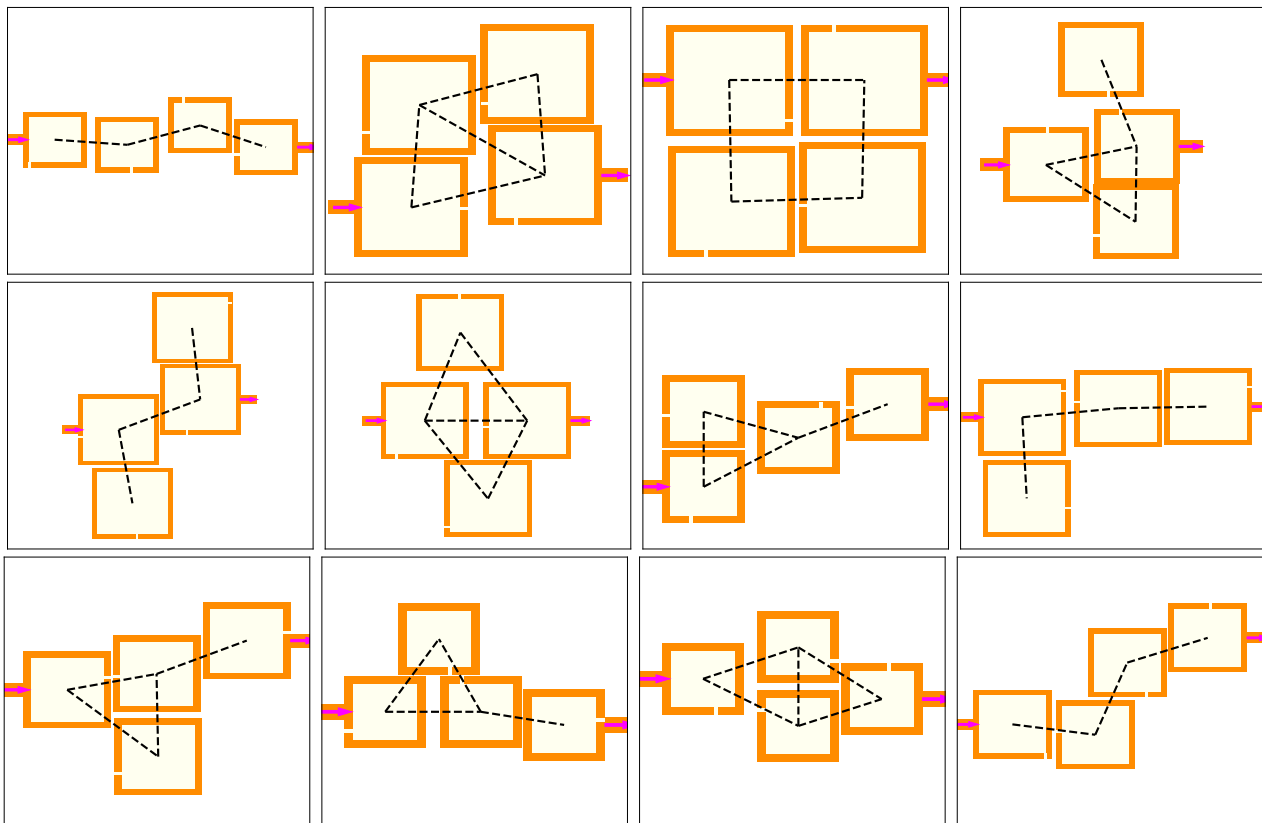

Figure 13. All different topologies for four resonator circuits.

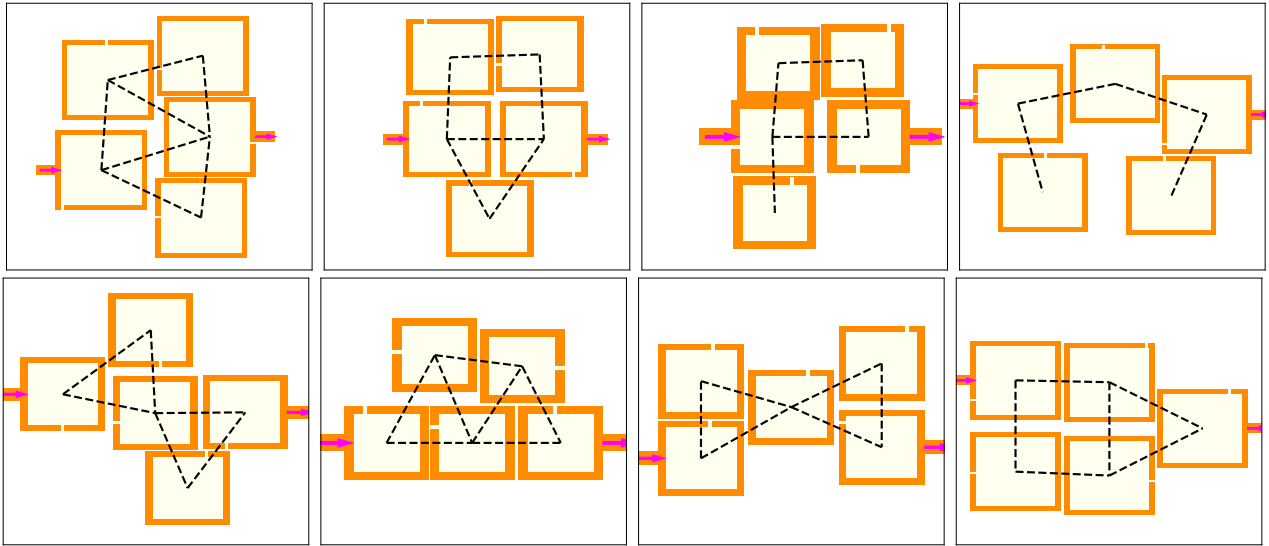

Figure 14. All different topologies for five resonator circuits.

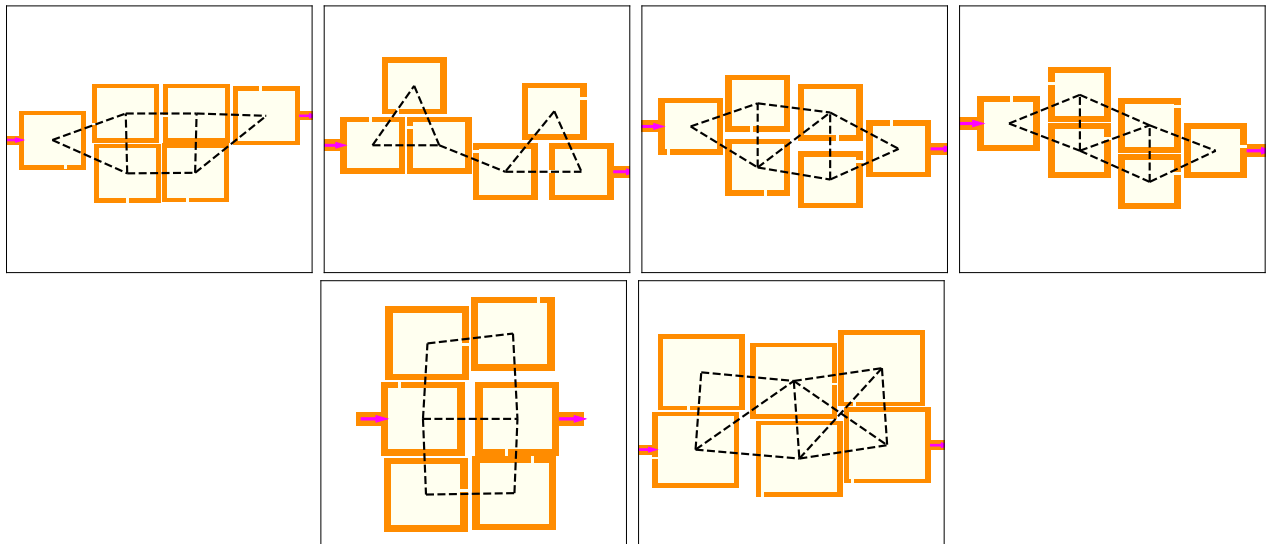

Figure 15. All different topologies for six resonator circuits.

## B. Visualization of the Channelizer Designed by Our Model

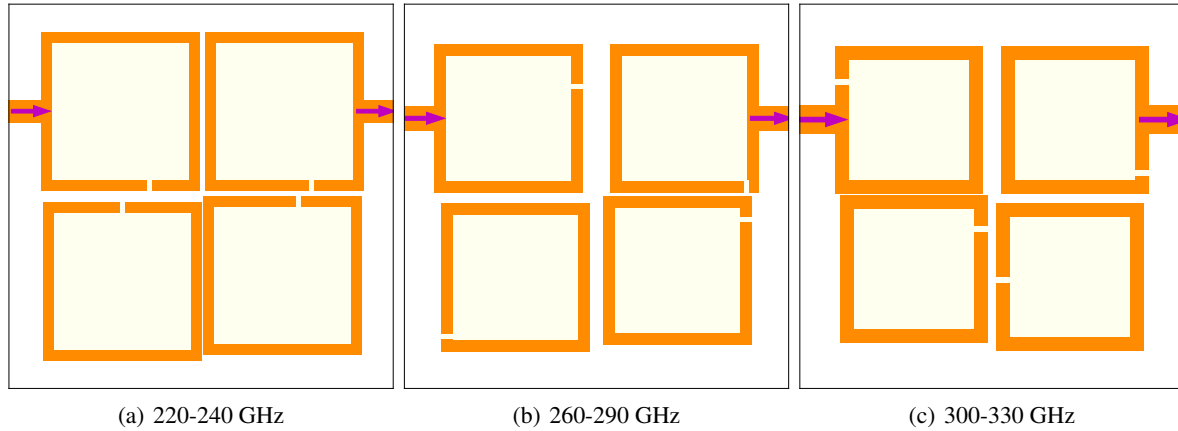

Figure 16. Our optimized circuits topologies for each channel. Although putting four resonators as a 2 by 2 structure is standard to create a single channel filter, the positions of the slit in the resonators are very unusual compared to the human designs.
